# Supplementary material for: Large-Eddy Simulation Sensitivities to Variations of Configuration and Forcing Parameters in Canonical Boundary-Layer Flows for Wind Energy Applications
Source: Copernicus journal article supplement (doi:10.5194/wes-2017-33), 2017-08-28
Supplement: Supplementary file [file wes-2017-33-AC2-supplement.pdf]

Interactive comment on “Large-Eddy Simulation Sensitivities to Variations of Configuration and Forcing Parameters in Canonical Boundary-Layer Flows for Wind Energy Applications” by Jeffrey D. Mirocha et al.

Anonymous Referee #2

The article is very interesting and is overall well formulated. It does approach a very interesting and important research area. It further contributes with important results, comparing a number of models, interesting for the research community. The performed simulations are performed for specific stability cases, please explain why these cases have been selected and others have been left out and to what extent these cases are relevant for the field. Perhaps the cases are chosen to available measurements data?

There are parts of the text where clarifications could improve the quality and readability of the article. For example, further explanation regarding the used measurement data and also the comparison between the measurements and LES data, is needed. I recommend this article for publication after minor revision based on the above comments.

*The authors thank the reviewer for the favorable assessment. We hope that the clarifications presented in response to reviewer 1's specific comments (particularly comment 2) are sufficient.*

*Several other small changes were made throughout the text to improve clarity and readability.*
